# Supplementary material
Source: PubMed Central journal article supplement (PMC7231657)
Supplement: NIHMS1586254-supplement-1.pdf [file NIHMS1586254-supplement-1.pdf]

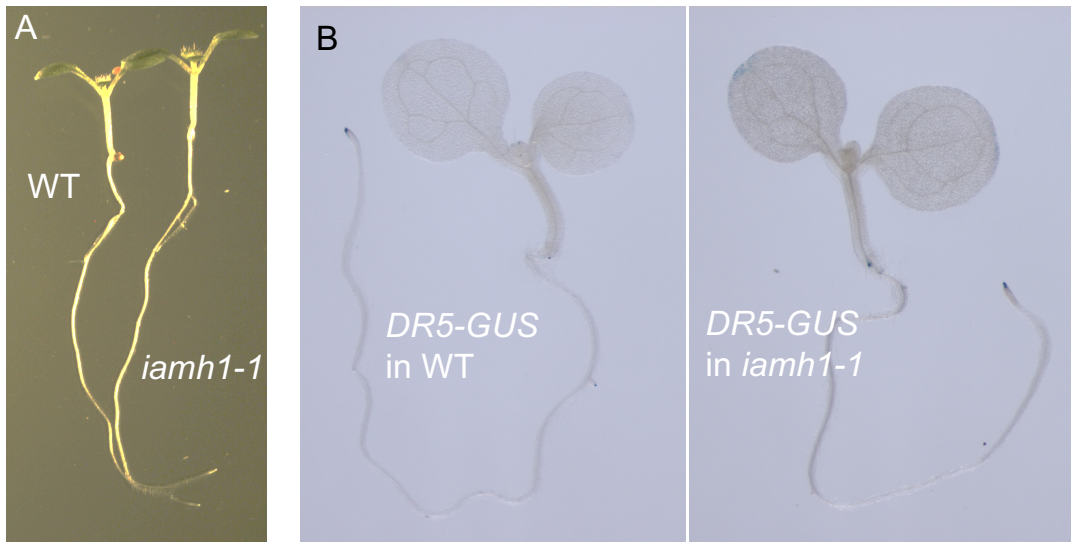

**SI Figure 1. Disruption of the *IAMH1* gene does not dramatically affect either *Arabidopsis* development or auxin reporter expression.** A) No obvious phenotypes were observed in the *iamh1-1* mutant. B) Expression of the auxin reporter *DR5:GUS* was not altered in the *iamh1-1* mutant.

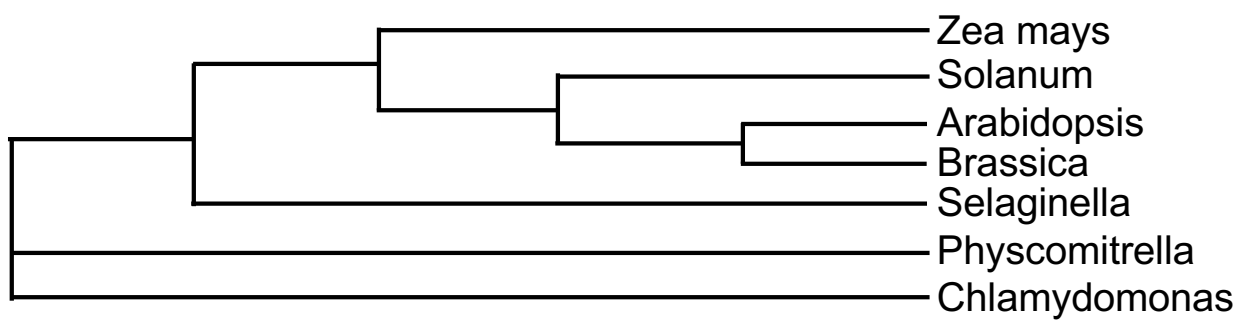

**SI Figure 2. Phylogenetic analysis of IAMH1 proteins across plant species.** The tree was generated using Clustal Omega online program. The shown tree is a Neighbour-joining tree without distance corrections.





GTCCTCTTCCAGGAGATGAA**TGGGG**ATTCAC WT

G T C C T C / T T C A C

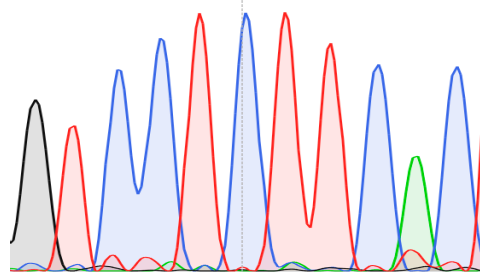

*iamh2-3*

G T C C T C T T C C A G G A G A T **T** G A A T G G G G A T T C A C

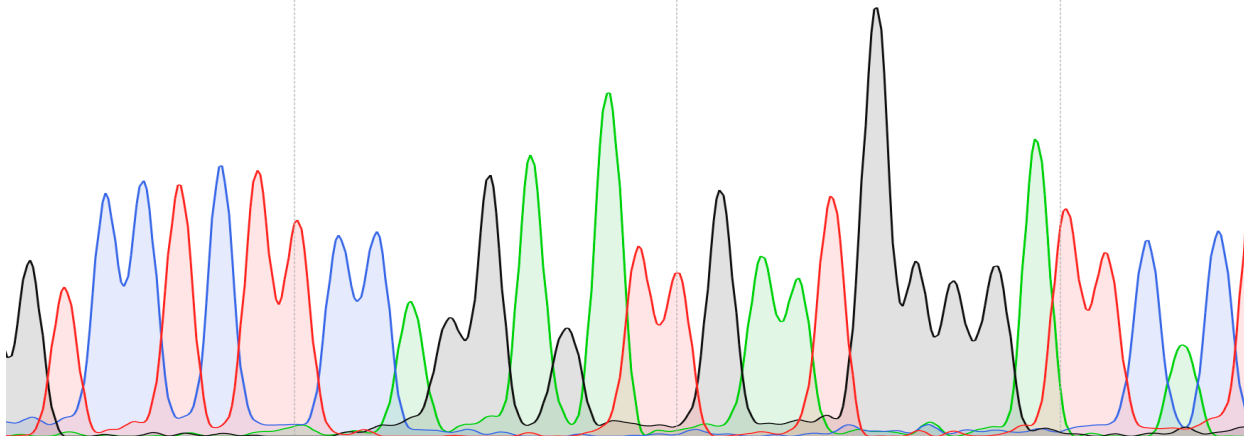

*iamh2-2*

**SI Figure 4. Sequence analysis of *iamh2* CRISPR mutants.** The *iamh2-2* contained an T insertion. The *iamh2-3* had a 20-bpo deletion.

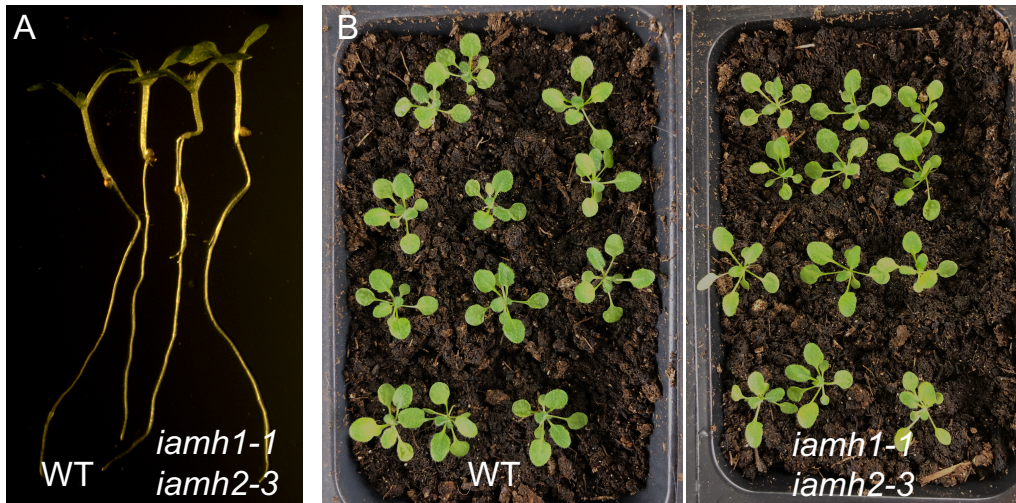

**SI Figure 5. The *iamh1 iamh2* double mutants grow similarly to WT plants.**  
A) The *iamh1-1 iamh2-3* double mutants did not display obvious phenotypes at seedling stages. B) Adult plants of *iamh1-1 iamh2-3* double mutants and WT were similar.
